# Supplementary material for: Selection and Validation of Reference Genes in Virus-Infected Sweet Potato Plants
Source: MDPI journal article supplement (doi:10.3390/genes14071477), 2023-07-19
Supplement: s1 [file s1]

Table S1. Primer sequences for eight candidate reference genes

| Gene name                                       | Gene symbol | GenBank Acc. | Primer sequence                                                   | Tm (° C) | Amplicon length (bp) |
|-------------------------------------------------|-------------|--------------|-------------------------------------------------------------------|----------|----------------------|
| <i>ADP-ribosylation factor</i>                  | <i>ARF</i>  | JX177359     | For 5'-GGGATGCTGTGTTGCTTGTG-3'<br>Rev 5'-AGAGCCAGTCCAATCCCTCAT-3' | 60       | 171                  |
| <i>glyceraldehyde-3-phosphate dehydrogenase</i> | <i>GAP</i>  | JX177362     | For 5'-ACTGTGCACGGACAATGGAAG-3'<br>Rev 5'-GCTTCAGCCCATGGAATCTC-3' | 60       | 125                  |
| <i>Phospholipase D1 alpha</i>                   | <i>PLD</i>  | JX177360     | For 5'-TGATGGCGACGTAACAGAGCT-3'<br>Rev 5'-ATGAGGCAAGCAGTGTGGTG-3' | 60       | 127                  |
| <i>Ubiquitin extension protein</i>              | <i>UBI</i>  | JX177358     | For 5'-TCGCCGACTACAACATCCAG-3'<br>Rev 5'-TTCCTCAGCCTCTGCACCTTT-3' | 60       | 189                  |
| <i>Actin</i>                                    | <i>ACT</i>  | EU250003     | For 5'-CTTCGTGTGCACCTGAGGA-3'<br>Rev 5'-CGTCCACTGGCATAACAAGGAT-3' | 60       | 161                  |
| <i>18S ribosomal RNA</i>                        | <i>18S</i>  | HM053484     | For 5'-ATGGTCGCAAGGCTGAACTT-3'<br>Rev 5'-CAGACAAATCGCTCCACCAAC-3' | 60       | 193                  |
| <i>Alpha tubulin</i>                            | <i>ATUB</i> | AB572296     | For 5'-TCCAACCTCCACCAGTGTGC-3'<br>Rev 5'-TCTCCTTCCTCCATACCCTCA-3' | 60       | 116                  |
| <i>Cyclophilin</i>                              | <i>CYP</i>  | CB330939     | For 5'-AACGGCTCGCAGTTCTTCATC-3'<br>Rev 5'-ACCGCCTCAGCCCTCTTAAT-3' | 60       | 113                  |
